# Supplementary material for: Synthesis, spectral and redox switchable cubic NLO properties of chiral dinuclear iron cyanide/isocyanide-bridged complexes
Source: Royal Society of Chemistry journal article supplement (doi:10.1039/c3dt51197a), 2013-01-01
Supplement: c3dt51197a.pdf [file c3dt51197a.pdf]

## Supporting Information

### **Synthesis, Spectral and Redox Switchable Cubic NLO Properties of Chiral Dinuclear Iron Cyanide/Isocyanide-bridged Complexes**

Xiao Ma, Chensheng Lin, Hui Zhang, Yi-Ji Lin, Sheng-Min Hu, Tian-Lu Sheng,\*  
and Xin-Tao Wu

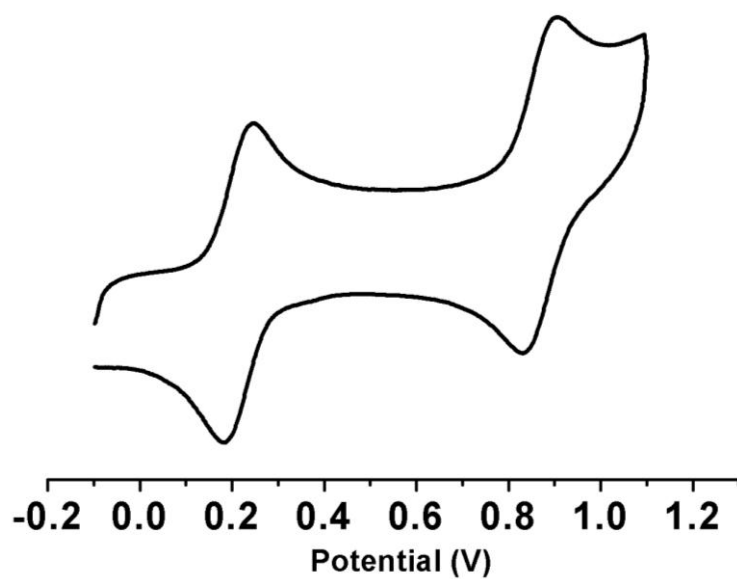

**Fig. S1** Cyclic voltammogram of complex  $2^+$  in a 0.10 M acetonitrile solution of  $\text{Bu}_4\text{NPF}_6$  at a scan rate of  $100 \text{ mV s}^{-1}$ .

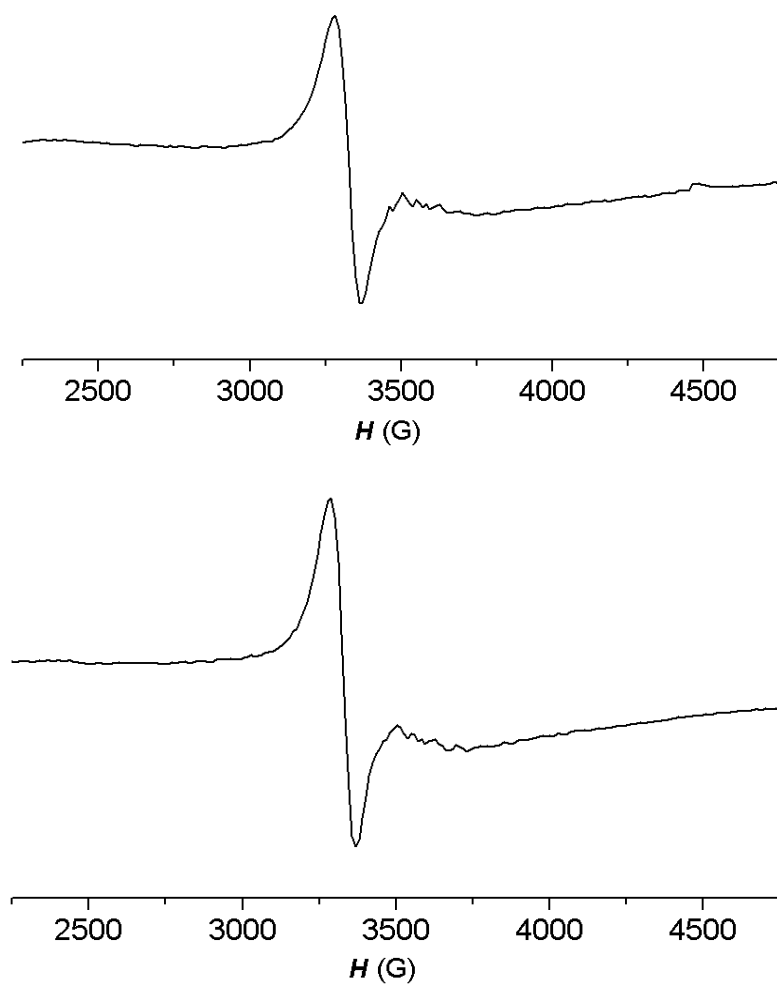

**Fig. S2** X-band EPR spectra of  $1[PF_6]_2$  (top) and  $2[PF_6]_2$  (bottom) recorded in  $CH_2Cl_2$  at room temperature.

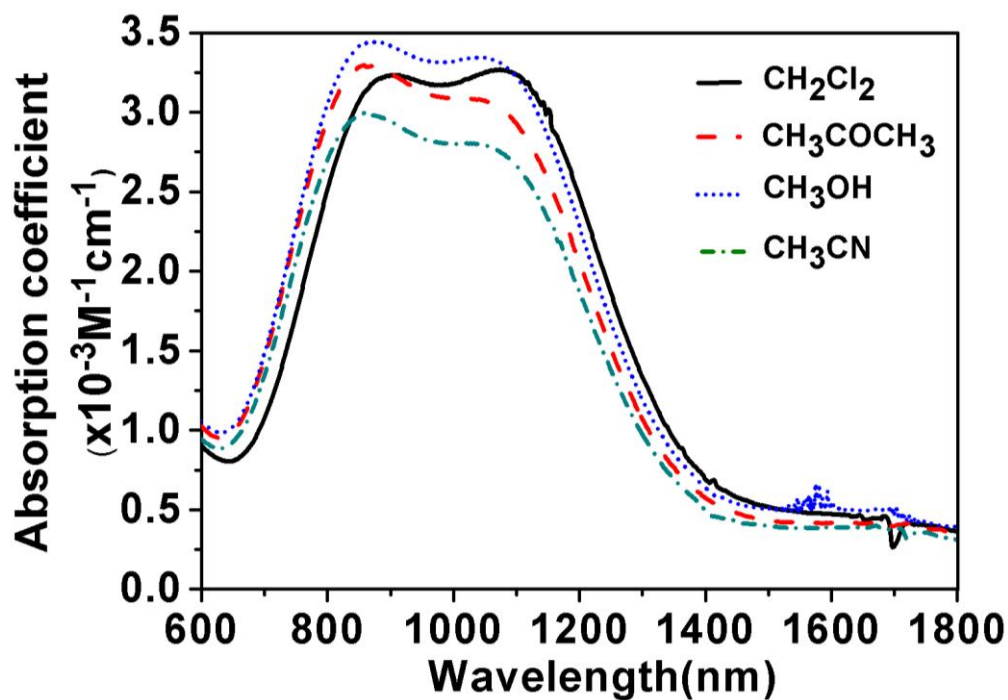

Fig. S3 IVCT band of complex  $1^{2+}$  in various solvents.

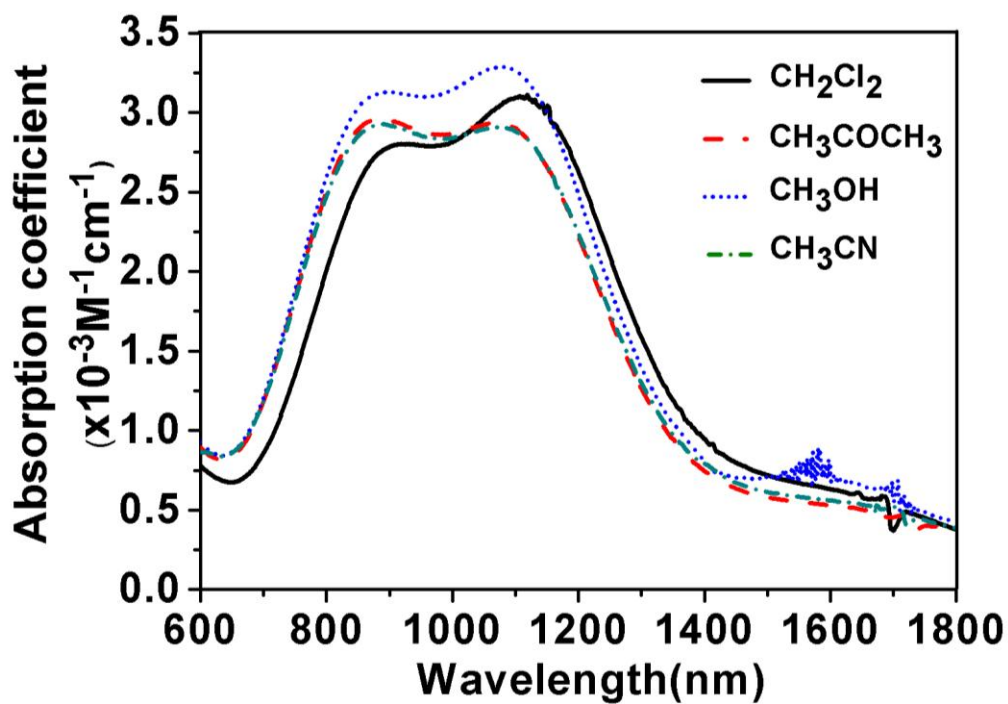

Fig. S4 IVCT band of complex  $2^{2+}$  in various solvents.

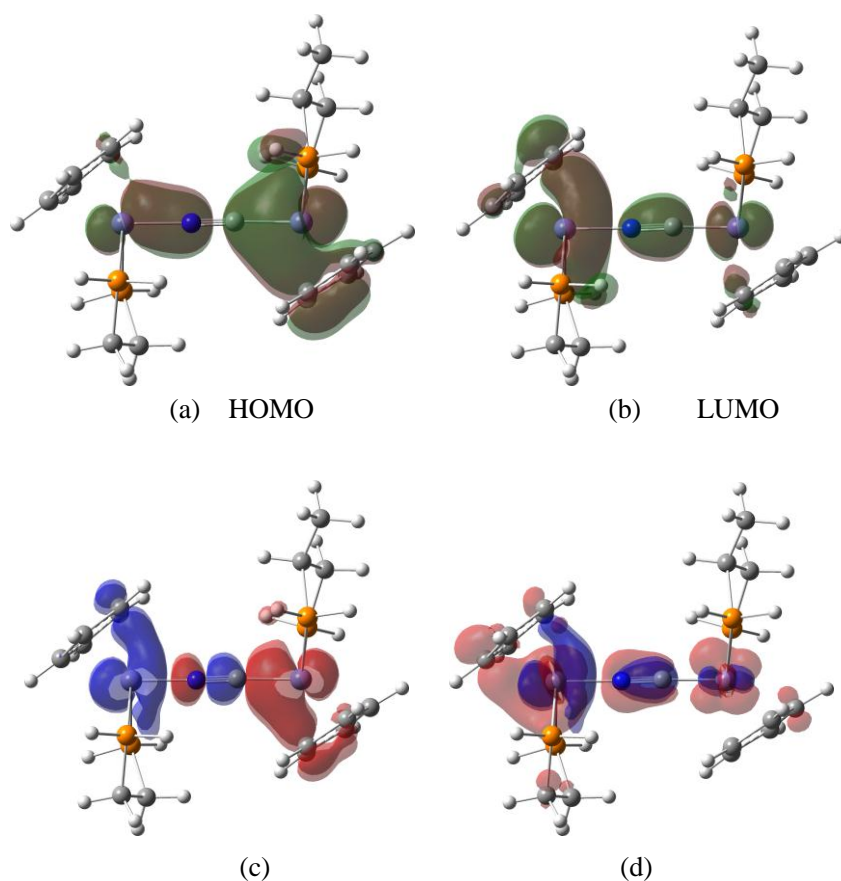

**Fig. S5** Molecular orbit diagram of HOMO (a) and LUMO (b) of  $2^{2+}$ , the isosurface value is  $\pm 0.02 \text{ e } \text{\AA}^{-3}$ ; (c) and (d) are the deformation of charge densities of  $2^{2+}$  in the predicted 1.323 and 1.075 eV excitations, respectively. The blue surfaces indicate regions that have gained the charge with respect to the ground state, and the red surfaces indicate the charge depletion. The isosurface value is  $\pm 0.001 \text{ e } \text{\AA}^{-3}$ .

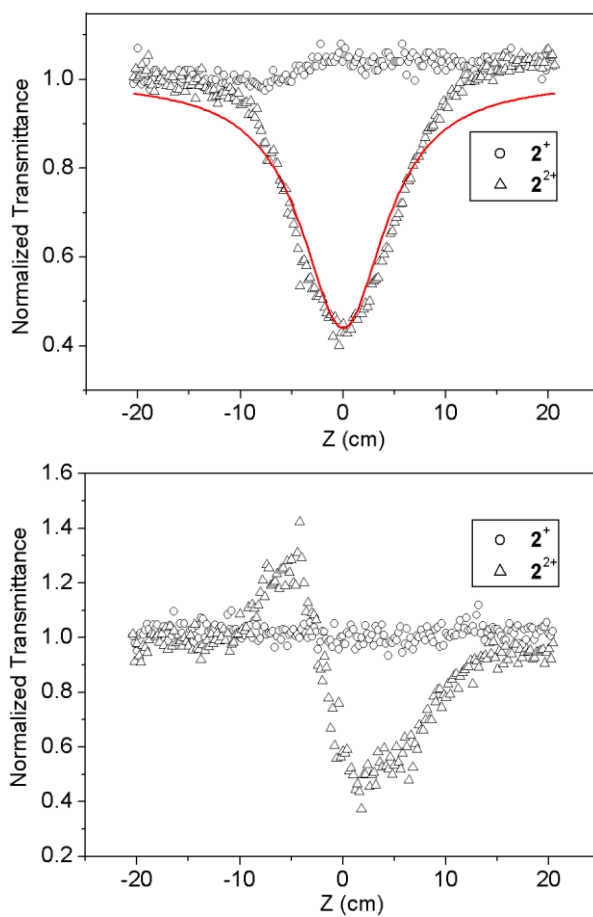

**Fig. S6** Open aperture Z-scan (the nonlinear absorptive) traces and Closed aperture Z-scan (the nonlinear refractive index) traces for  $2^{n+}$  ( $n = 1, 2$ ) in  $\text{CH}_2\text{Cl}_2$ .

**Table S1.** Crystallographic data and structure refinements summary for complexes **1<sup>+</sup>** and **2<sup>+</sup>**

|                                                                                | <b>1<sup>+</sup></b>                                                                            | <b>2<sup>+</sup></b>                                                            |
|--------------------------------------------------------------------------------|-------------------------------------------------------------------------------------------------|---------------------------------------------------------------------------------|
| formula                                                                        | Fe <sub>2</sub> C <sub>66</sub> H <sub>65</sub> F <sub>6</sub> NO <sub>0.5</sub> P <sub>5</sub> | Fe <sub>2</sub> C <sub>68</sub> H <sub>70</sub> F <sub>6</sub> NOP <sub>5</sub> |
| fw (g/mol)                                                                     | 1260.74                                                                                         | 1297.80                                                                         |
| color                                                                          | dark-brown                                                                                      | dark-brown                                                                      |
| <i>T</i> (K)                                                                   | 293(2)                                                                                          | 293(2)                                                                          |
| Crystal system                                                                 | triclinic                                                                                       | triclinic                                                                       |
| Space group                                                                    | <i>P</i> 1                                                                                      | <i>P</i> 1                                                                      |
| <i>Z</i>                                                                       | 2                                                                                               | 2                                                                               |
| <i>a</i> [Å]                                                                   | 12.049(8)                                                                                       | 12.061(15)                                                                      |
| <i>b</i> [Å]                                                                   | 12.430(7)                                                                                       | 12.350(13)                                                                      |
| <i>c</i> [Å]                                                                   | 23.884(18)                                                                                      | 23.73(3)                                                                        |
| $\alpha$ [°]                                                                   | 75.14(3)                                                                                        | 74.95(5)                                                                        |
| $\beta$ [°]                                                                    | 77.48(3)                                                                                        | 77.34(5)                                                                        |
| $\gamma$ [°]                                                                   | 66.54(3)                                                                                        | 66.64(4)                                                                        |
| <i>V</i> [Å <sup>3</sup> ]                                                     | 3145(4)                                                                                         | 3107(6)                                                                         |
| Density (calcd.)[g·cm <sup>-3</sup> ]                                          | 1.331                                                                                           | 1.387                                                                           |
| $\mu$ [mm <sup>-1</sup> ]                                                      | 0.647                                                                                           | 0.658                                                                           |
| $\theta$ -range [°]                                                            | 3.09, 25.50                                                                                     | 2.02, 25.00                                                                     |
| Index range                                                                    | -14 ≤ <i>h</i> ≤ 14<br>-11 ≤ <i>k</i> ≤ 14<br>-28 ≤ <i>l</i> ≤ 28                               | -14 ≤ <i>h</i> ≤ 14<br>-13 ≤ <i>k</i> ≤ 14<br>-28 ≤ <i>l</i> ≤ 28               |
| Reflections collected                                                          | 18545                                                                                           | 14773                                                                           |
| Unique reflections                                                             | 13722                                                                                           | 13208                                                                           |
| Observed reflections ( <i>I</i> > 2σ( <i>I</i> ))                              | 9554                                                                                            | 8808                                                                            |
| parameters refined                                                             | 1402                                                                                            | 1459                                                                            |
| Flack parameter                                                                | 0.11(4)                                                                                         | 0.12(4)                                                                         |
| Final <i>R</i> <sub>1</sub> values ( <i>I</i> > 2σ( <i>I</i> ))                | 0.0782                                                                                          | 0.0785                                                                          |
| Final w <i>R</i> ( <i>F</i> <sup>2</sup> ) values ( <i>I</i> > 2σ( <i>I</i> )) | 0.1548                                                                                          | 0.1685                                                                          |
| Final <i>R</i> <sub>2</sub> values (all data)                                  | 0.1068                                                                                          | 0.1079                                                                          |
| Final w <i>R</i> ( <i>F</i> <sup>2</sup> ) values (all data)                   | 0.1746                                                                                          | 0.1900                                                                          |
| GOOF (goodness of fit)                                                         | 0.982                                                                                           | 0.891                                                                           |

$$R_1 = \Sigma(|F_0| - |F_c|) / \Sigma|F_0|;$$

$$wR_2 = [\Sigma w(|F_0|^2 - |F_c|^2)^2 / \Sigma w|F_0|^2]^1/2$$
